# Supplementary material for: Multifunctional inorganic nanomaterials for energy applications
Source: Royal Society of Chemistry journal article supplement (doi:10.1039/c9nr07008g), 2019-11-18
Supplement: c9nr07008g1.pdf [file c9nr07008g1.pdf]

## Supporting Information

### Multifunctional inorganic nanomaterials for energy applications

Huilin Wang,<sup>a,b</sup> Xitong Liang,<sup>a,b</sup> Jiutian Wang,<sup>a,b</sup> Shengjian Jiao<sup>a,b</sup>  
and Dongfeng Xue<sup>\*a,b</sup>

\*Corresponding author: E-mail: [dongfeng@ciac.ac.cn](mailto:dongfeng@ciac.ac.cn)

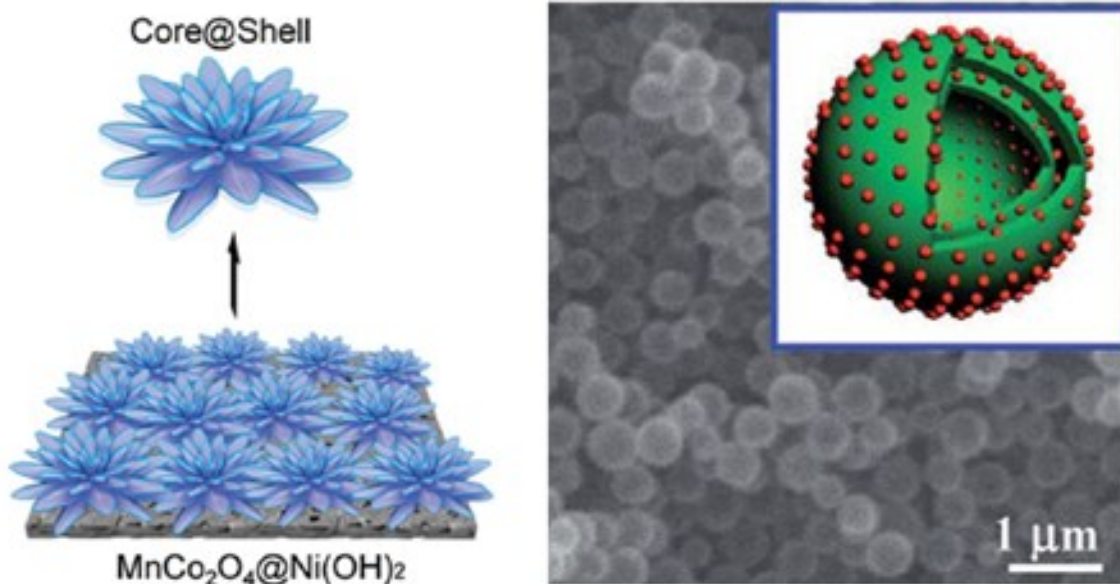

**Fig. S1** MnCo<sub>2</sub>O<sub>4</sub>@Ni(OH)<sub>2</sub> core-shell flowers for asymmetric supercapacitor materials with ultrahigh specific capacitance and V<sub>2</sub>O<sub>5</sub>-SnO<sub>2</sub> double-shelled nanospheres. <sup>1,2</sup>

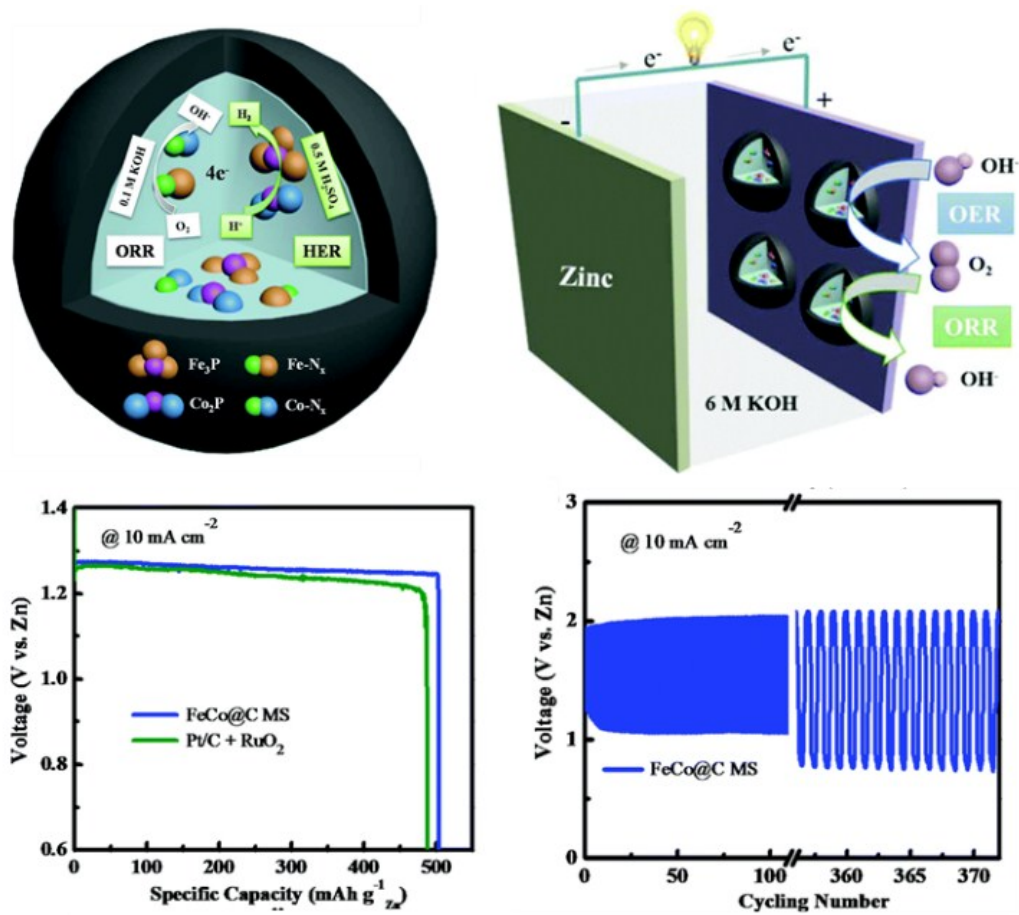

**Fig. S2** (a) Schematic illustration of ORR and HER processes of FeCo@C MS. (b) Illustration of the rechargeable Zn–air battery. (c) Electrochemical performance of rechargeable Zn–air batteries using FeCo@C MS as catalysts in 6 M KOH. Galvanostatic discharge curves of primary Zn–air batteries. The specific capacity is normalized by the mass of the consumed Zn anode. (d) Pulse cycling performance of the rechargeable Zn–air batteries using FeCo@C MS at  $10\ mA\ cm^{-2}$  with 5 min discharge and 5 min charge. <sup>3</sup>

**Table S1** Summaries of performance and preparation of multifunctional inorganic materials in various energy applications

|                   | Material                                      | Morphology      | Application    | Performance                                                                                                             | Preparation                  | Reference |
|-------------------|-----------------------------------------------|-----------------|----------------|-------------------------------------------------------------------------------------------------------------------------|------------------------------|-----------|
| Energy generation | SnSe                                          | Nanosheet       | Thermoelectric | Low thermal conductivity<br>High ZT of 0.055 at 501 K                                                                   | Thermal evaporation          | 4         |
|                   | Cd-doped SnSe                                 | Nano-crystal    | Thermoelectric | Low thermal conductivity<br>High power factor<br>High hole carrier concentration<br>High ZT approximate to 1.7 at 823 K | Solvothermal                 | 5         |
|                   | Sn <sub>0.99</sub> Na <sub>0.01</sub> Se-STSe | Nanoprecipitate | Thermoelectric | Ultralow lattice thermal conductivity of below 0.3 W m <sup>-1</sup> K <sup>-1</sup><br>High peak ZT of 1.33 at 773 K   | High temperature melting     | 6         |
|                   | PbTe-4% InSb                                  | Nanocomposite   | Thermoelectric | High ZT of 1.83 at 773 K                                                                                                | High pressure heat treatment | 7         |
|                   | Cu <sub>5</sub> FeS <sub>4</sub>              | Core-shell      | Thermoelectric | High power factor<br>Low thermal conductivity<br>Enhanced ZT value of ≈0.62 at 710 K                                    | Colloidal synthesis          | 8         |
|                   | Cu <sub>2</sub> Se/CNT                        | Nanocomposite   | Thermoelectric | Low lattice thermal conductivity<br>Record-high ZT of 2.4 at 1000 K                                                     | High energy ball-milling     | 9         |
|                   | C <sub>60</sub> /TiS <sub>2</sub>             | Nanocomposite   | Thermoelectric | Flexible<br>High Seebeck coefficient<br>High power factor                                                               | Printing                     | 10        |

|                   |                                    |                     |               |                                                                                                                                                                                                                           |                                                 |    |
|-------------------|------------------------------------|---------------------|---------------|---------------------------------------------------------------------------------------------------------------------------------------------------------------------------------------------------------------------------|-------------------------------------------------|----|
|                   |                                    |                     |               | High ZT approximate to 0.3 at 400 K                                                                                                                                                                                       |                                                 |    |
|                   | Kevlar microfiber-ZnO              | Nanowire            | Piezoelectric | High flexibility<br>Robustness and durability<br>Open-circuit voltage and short-circuit current are 1.8 mV and 4.8 pA, respectively.                                                                                      | Solvothermal                                    | 11 |
|                   | S-treated MoS <sub>2</sub>         | Nanosheet           | Piezoelectric | Output peak current and voltage are increased by more than 3 times (100 pA) and 2 times (22 mV), respectively.                                                                                                            | Chemical vapor deposition                       | 12 |
|                   | PVDF-AgNW                          | Nanofiber           | Triboelectric | Excellent mechanical stability<br>High output performances                                                                                                                                                                | Electrospinning                                 | 13 |
|                   | P(VDF-TrFE)                        | Nanocomposite       | Triboelectric | Boosting power-generating performance is achieved for 1130 V of output voltage and 1.5 mA of output current                                                                                                               | Spin-coating heat treatment                     | 14 |
|                   | Al/PTFE                            | Micro-nanocomposite | Triboelectric | Excellent high-temperature tolerance (temperature range of -30 to 550 °C)<br>Wear-resisting ability<br>High hardness (rockwell hardness: 63 HRM)<br>High output voltage and current of 221 V and 27.9 μA cm <sup>-2</sup> | Ball-milling                                    | 15 |
| Energy conversion | ZnO-SnO <sub>2</sub>               | Core-shell          | Solar cell    | PCE : 14.35%<br>Good match between the energy level of the SnO <sub>2</sub> shell<br>High electron mobility of the core ZnO nanoparticles                                                                                 | Coprecipitation                                 | 16 |
|                   | TiO <sub>2</sub> -SiO <sub>2</sub> | Core-shell          | Solar cell    | PCE : 7.00%<br>Anti-reflective coating decrease the reflectance by producing a refractive index gradient                                                                                                                  | E-beam evaporation and chemical bath deposition | 17 |

|                                   |                           |            |                                                                                                                                                                                                                                                                 |                                      |    |
|-----------------------------------|---------------------------|------------|-----------------------------------------------------------------------------------------------------------------------------------------------------------------------------------------------------------------------------------------------------------------|--------------------------------------|----|
| n-ZnO/p-SnS                       | Core-shell nanowire array | Solar cell | Relative conversion efficiency : 37.3%<br>The piezo-phototronic effect was effectively applied to improve<br>The relative conversion efficiency                                                                                                                 | Rf magnetron sputtering              | 18 |
| PbS-CdS                           | Core-shell quantum dot    | Solar cell | PCE : 2.5%<br>Improved passivation of the PbS<br>Surface by the CdS shell, leading to a lower electron trap density                                                                                                                                             | Hot injection                        | 19 |
| WO <sub>3</sub> -TiO <sub>2</sub> | Core-shell                | Solar cell | PCE : 11.24%<br>WO <sub>3</sub> nanosheet arrays yield significantly enhanced photovoltaic performance as compared to nanoparticles and nanorod arrays<br>Due to good perovskite absorber infiltration in the porous scaffold and more rapid carrier transport. | Electrospraying and hydrothermal     | 20 |
| PbSe-PbS                          | Core-shell quantum dot    | Solar cell | PCE: 6.5%<br>PbS shell formation on the PbSe core mitigates the trade-off relationship between the open circuit voltage and the short circuit current density.                                                                                                  | Precipitation                        | 21 |
| Pt-C                              | Core-shell                | Fuel cell  | A negligible voltage loss after 30000 cycles<br>The robustness of the carbon shells that secure the Pt nanoparticles.                                                                                                                                           | Ultrasonic mixing and heat treatment | 22 |
| IrNi@PdIr/C                       | Core-shell                | Fuel cell  | Specific activity is 2.2 times that of commercial Pt/C<br>PdIr shell inhibits oxide formation.                                                                                                                                                                  | Replacement reaction                 | 23 |
| Pd/PtCu                           | Core-shell                | Fuel cell  | ORR and MOR mass activities were 8.3 and 3.3 times higher than those of commercial Pt, respectively                                                                                                                                                             | One-pot epitaxial growth             | 24 |

|                |                                                                                     |                    |                 |                                                                                                                                                                                                                                             |                                        |    |
|----------------|-------------------------------------------------------------------------------------|--------------------|-----------------|---------------------------------------------------------------------------------------------------------------------------------------------------------------------------------------------------------------------------------------------|----------------------------------------|----|
|                |                                                                                     |                    |                 | Lower the catalyst cost but also improve the catalytic activity and stability                                                                                                                                                               |                                        |    |
|                | Pt-Rh <sub>x</sub> S <sub>y</sub>                                                   | Core-shell         | Fuel cell       | Electrochemical active surface area/mass of core-shell catalyst is 7 times that of commercial Rh <sub>x</sub> S <sub>y</sub> catalyst.                                                                                                      | Precipitate and thermal treatment      | 25 |
|                | CNT/Ni                                                                              | □                  | Fuel cell       | The functionalized redox nanomaterial exhibits reversible electrocatalytic activity for the H <sub>2</sub> /2H <sup>+</sup> interconversion from pH 0 to 9, with catalytic preference for H <sub>2</sub> oxidation at all pH values.        | -                                      | 26 |
|                | Co <sub>9</sub> S <sub>8</sub> /MoS <sub>2</sub>                                    | Core-shell         | Catalysis       | HER: 97 mV (10 mA cm <sup>-2</sup> )<br>Tafel slope: 71 mV dec <sup>-1</sup><br>Precisely tune<br>Tensile surface strain                                                                                                                    | S vapor-assisted                       | 27 |
|                | CoP@PS                                                                              | Core-shell         | Catalysis       | Her: 80 mV (10 mA cm <sup>-2</sup> )<br>The significant enhancing effect from nanometer thick amorphous PS layer on the turnover process                                                                                                    | Wet chemical process and phosphidation | 28 |
|                | PtPb/Pt                                                                             | Core-shell         | Catalysis       | 50,000 voltage cycles with negligible activity decay                                                                                                                                                                                        | Nonaqueous conditions                  | 29 |
| Energy storage | crystallineFe <sub>2</sub> O <sub>3</sub> /amorphous Fe <sub>2</sub> O <sub>3</sub> | Core-shell nanorod | Supercapacitors | Capacitance of 701 F g <sup>-1</sup><br>The tunable amorphous Layer facilitates the Li <sup>+</sup> diffusion while introduced oxygen defects in Fe <sub>2</sub> O <sub>3</sub> can be effectively tuned to improve electronic conductivity | Hydrothermal and heat treatment        | 30 |
|                | P-doped Ni(OH) <sub>2</sub> -MnO <sub>2</sub>                                       |                    | Supercapacitors | Areal capacitance of 5.75 F cm <sup>-2</sup><br>Without capacitance loss at after 10 000 cycles                                                                                                                                             | Hydrothermal                           | 31 |

|                                                                  |                            |                 |  |                                                                                                                                                                                                                                                                                                                                                                                |                                     |    |
|------------------------------------------------------------------|----------------------------|-----------------|--|--------------------------------------------------------------------------------------------------------------------------------------------------------------------------------------------------------------------------------------------------------------------------------------------------------------------------------------------------------------------------------|-------------------------------------|----|
|                                                                  |                            |                 |  | Large surface area, good mechanical stability<br>High ion diffusivity and numerous electroactive sites                                                                                                                                                                                                                                                                         |                                     |    |
| Zinc–nickel-cobalt oxide<br>@Ni(OH) <sub>2</sub>                 | Core–shell nanowire arrays | Supercapacitors |  | Specific capacitance of 2847.5 F cm <sup>-3</sup> (10.678 F cm <sup>-2</sup> )<br>The increased electrical conductivity of the core electrode                                                                                                                                                                                                                                  | Hydrothermal and calcination        | 32 |
| Co <sub>3</sub> O <sub>4</sub> @NiCo <sub>2</sub> O <sub>4</sub> | Core-shell                 | Supercapacitors |  | Specific capacitance of 1450 F g <sup>-1</sup><br>Cycling stability (~4.2% loss after 6000 cycles)<br>Rational design of nico <sub>2</sub> o <sub>4</sub> nanoflakes adhering on Co <sub>3</sub> O <sub>4</sub> nanowires, which promotes two electroactive materials utilizing the synergistic effect to supply more pathways for accelerating fast electron and ion transfer | Hydrothermal                        | 33 |
| Ni-Co@Ni-Co LDH                                                  | Core-shell                 | Supercapacitors |  | Capacitance of 2200 F g <sup>-1</sup><br>98.9 % after 5000 cycles<br>A novel hierarchical nanotube array with a massive layered top and discretely separated nanotubes in a core–shell structure                                                                                                                                                                               | Template assisted electrodeposition | 34 |
| MnCo <sub>2</sub> O <sub>4</sub> @Ni(OH) <sub>2</sub>            | Core–shell flowers         | Supercapacitors |  | Capacitance of 2154 F g <sup>-1</sup><br>Hierarchical structure can not only efficiently ensure the synergetic effect of the two pseudocapacitive materials but also promote the diffusion and migration of electrolyte ions during the rapid charge/discharge process                                                                                                         | Hydrothermal                        | 1  |
| ErOOH                                                            | Colloid                    | Supercapacitors |  | Capacitance of 1811 F g <sup>-1</sup><br>Short ion diffusion and electron transfer length to enable the fast and                                                                                                                                                                                                                                                               | In situ coprecipitation             | 35 |



|                                                 |                          |                       |                                                                                                                                                                                                                                                                                                                                                                                                                                  |                                                    |  |    |
|-------------------------------------------------|--------------------------|-----------------------|----------------------------------------------------------------------------------------------------------------------------------------------------------------------------------------------------------------------------------------------------------------------------------------------------------------------------------------------------------------------------------------------------------------------------------|----------------------------------------------------|--|----|
|                                                 |                          |                       |                                                                                                                                                                                                                                                                                                                                                                                                                                  | reversible faradaic reactions                      |  |    |
| V <sub>2</sub> O <sub>5</sub> -SnO <sub>2</sub> | Core-shell               | Lithium-ion batteries | Anode: 947 mA h g <sup>-1</sup><br>Cathode: 174 mA h g <sup>-1</sup><br>The current nanoarchitecture provides short li ion pathways and high electronic and ionic conductivity, and the hollow architecture is able to accommodate large volume variations                                                                                                                                                                       | Coprecipitation                                    |  | 2  |
| Mn <sub>1-x</sub> Fe <sub>x</sub> P             | Solid solution phosphide | Lithium-ion batteries | A capacity of 360 mA h g <sup>-1</sup> after 100 cycles at a high current density of 2 A g <sup>-1</sup>                                                                                                                                                                                                                                                                                                                         | High energy mechanical milling                     |  | 36 |
| Cu <sub>3</sub> Si-Si@C@G                       | Core-shell               | Lithium-ion batteries | Good rate performance and delivers reversible capacity of 483 mA h g <sup>-1</sup> after 500 cycles with capacity retention of about 80% at high current density of 4 A g <sup>-1</sup>                                                                                                                                                                                                                                          | Sol-gel coating                                    |  | 37 |
| H-MoP@rGO                                       | Core-shell               | Sodium-ion batteries  | The specific capacity is as high as 353.8 mA h g <sup>-1</sup> at 1 A g <sup>-1</sup> after 600 cycles<br>Extraordinary rate performance of 183.4 mA h g <sup>-1</sup> at an ultrahigh current density of 10 A g <sup>-1</sup> even after 3000 cycles.                                                                                                                                                                           | Hydrothermal followed by phosphorization procedure |  | 38 |
| FeS <sub>2</sub>                                | Foam-like nanostructure  | Sodium-ion batteries  | High electrical conductivity<br>Good ion diffusion kinetics<br>High inhibition capacity of volume expansion.<br>High capacity of 823 mA h g <sup>-1</sup> at 0.1 A g <sup>-1</sup> , very close to the theoretical capacity of FeS <sub>2</sub><br>Good rate capability of 581 mA h g <sup>-1</sup> at 5.0 A g <sup>-1</sup><br>Good cycle ability of 754 mA h g <sup>-1</sup> at 0.2 A g <sup>-1</sup> with 97% retention after | Solution combustion followed by heat treatment     |  | 39 |

|                                                |                                     |                          |  |                                                                                                                                                                                                                              |                                                      |    |
|------------------------------------------------|-------------------------------------|--------------------------|--|------------------------------------------------------------------------------------------------------------------------------------------------------------------------------------------------------------------------------|------------------------------------------------------|----|
|                                                |                                     |                          |  | 80 cycles                                                                                                                                                                                                                    |                                                      |    |
| VS <sub>4</sub>                                | 3D self-assembled nanoarchitectures | Sodium-ion batteries     |  | High reversible capacity of 412 mA h g <sup>-1</sup> at 0.2 A g <sup>-1</sup> after 230 cycles<br>Capacity of 345 and 293 mA h g <sup>-1</sup> even at 1.0 and 2.0 A g <sup>-1</sup> , respectively                          | Hydrothermal                                         | 40 |
| Ti <sub>2</sub> Nb <sub>2</sub> O <sub>9</sub> | Nanosheet                           | Sodium-ion batteries     |  | High reversible capacity of 250 mA h g <sup>-1</sup> at 50 mA g <sup>-1</sup> at a suitable average voltage of approximate to 0.7 V.                                                                                         | Liquid exfoliation combined with thermal dehydration | 41 |
| Ni/PCNFO                                       | Nanofiber                           | Lithium-sulfur batteries |  | High electrical conductivity<br>High specific capacity of 1320 mA h g <sup>-1</sup><br>Excellent rate capability of 780 mA h g <sup>-1</sup><br>Long cycling stability of 910 mA h g <sup>-1</sup> after 500 cycles at 0.2 C | Electrospinning                                      | 42 |
| 3DNG/TiN                                       | Composite                           | Lithium-sulfur batteries |  | Ultrahigh areal capacity of 12.0 mA h cm <sup>-2</sup> at a high current density of 8.03 mA cm <sup>-2</sup>                                                                                                                 | Hydrothermal                                         | 43 |
| rGO/GC/S                                       | Composite                           | Lithium-sulfur batteries |  | High capacity of 524 mA h g <sup>-1</sup> after 100 cycles at a current rate of 0.2 C                                                                                                                                        | Low-temperature wet spinning                         | 44 |
| Fe <sub>3</sub> C@N-C                          | Core-shell                          | Lithium-sulfur batteries |  | High capacity of 1351 mA h g <sup>-1</sup> at 0.1 C<br>Outstanding rate capability and cycling stability                                                                                                                     | Thermal treatment                                    | 45 |
| Ni-doped CoO                                   | Nanosheet                           | zinc-air batteries       |  | Excellent performance with a record-high discharge peak power density of 377 mW cm <sup>-2</sup> , and works stable for >400 h at 5 mA cm <sup>-2</sup>                                                                      | Hydrothermal                                         | 46 |
| FeCo@C MS                                      | Core-shell                          | zinc-air batteries       |  | High discharge voltage of 1.27 V<br>High specific capacity of 503 mA h g <sup>-1</sup>                                                                                                                                       | Solvothermal followed by two-step                    | 3  |

|               |                                         |                                |                 |                                                                                                                                                                                                                                |                                                   |    |
|---------------|-----------------------------------------|--------------------------------|-----------------|--------------------------------------------------------------------------------------------------------------------------------------------------------------------------------------------------------------------------------|---------------------------------------------------|----|
|               |                                         |                                |                 | Energy density of 639 W h kg <sup>-1</sup>                                                                                                                                                                                     | carbonization                                     |    |
| Energy saving | WO <sub>3</sub>                         | Tunneled phosphorus-doped film | Smart window    | 6.1 s for the colouration speed and 2.5 s for the bleaching speed<br>Colouration efficiency 55.9 cm <sup>2</sup> C <sup>-1</sup><br>Higher retention (91.5%) of transmittance modulation after 1000 electrochromic (EC) cycles | Precipitation, anneal, red P ignition             | 47 |
|               | WO <sub>3</sub>                         | Mesoporous film                | Smart window    | T <sub>c</sub> = 1.4 s<br>T <sub>b</sub> = 1.1 s<br>93.1% of the original value after 1000 cycles and 74.6% after 2500 cycles<br>CE value of 79.7 cm <sup>2</sup> C <sup>-1</sup>                                              | Dip-coating sol-gel                               | 48 |
|               | Cs <sub>x</sub> WO <sub>3</sub>         | Nanorod                        | Smart window    | Visible light transmittance reaching 78.22%<br>NIR shielding rate being 97.36%<br>Transparent insulation index attaining 175.58                                                                                                | Solvothermal, heat-treat, citric acid thermolysis | 49 |
|               | Pt-doped K <sub>x</sub> WO <sub>3</sub> | Nanorod                        | Smart window    | Visible light transmittance reaching 39.58%<br>NIR shielding rate being 94.75%                                                                                                                                                 | Solvothermal                                      | 50 |
|               | M <sub>x</sub> WO <sub>3</sub> /ZnO     | Nanorod                        | Smart window    | Visible light transmittance reaching 92 %<br>High NIR shielding rate<br>50% of toxic no gas could be decomposed by composite and relevant film under the irradiation of UV light                                               | Hydrothermal                                      | 51 |
|               | BN                                      | Nanosheet                      | Cooling liquids | 2.39 W mK <sup>-1</sup> at 24 vol% loading                                                                                                                                                                                     | Molten alkali-assisted liquid                     | 52 |
|               | Graphene                                | Nanoplatelet                   | Coolants        | The maximum thermal conductivity enhancement of 22.92% is                                                                                                                                                                      | Sonication                                        | 53 |

|                     |                                                                                       |                   |                   |                                                                                                                                                                                                                                     |                             |    |
|---------------------|---------------------------------------------------------------------------------------|-------------------|-------------------|-------------------------------------------------------------------------------------------------------------------------------------------------------------------------------------------------------------------------------------|-----------------------------|----|
|                     |                                                                                       |                   |                   | attained for the sample containing 0.1 wt% at a fluid temperature of 45 °C<br>The dynamic viscosity and density are close to those for DI water<br>High stability                                                                   |                             |    |
|                     | GO-TiO <sub>2</sub>                                                                   | Nanosheet         | Nanolubricant     | The film thickness of lubricant with GO-TiO <sub>2</sub> was 28.07 nm                                                                                                                                                               | Solvothermal                | 54 |
| Energy transmission | Al/InAs                                                                               | Nanowire          | Superconductivity | Biasing the junction to $\phi \approx \pi$ reduces the critical field at which the zero-bias peak appears, with respect to $\phi = 0$                                                                                               | Electron beam lithography   | 55 |
|                     | Nb/InAs, Al/InAs                                                                      | Nanowire          | Superconductivity | Al/InAs-nanowire/Al junctions comprising an Al electrode separation of 220 nm<br>With no clear Josephson supercurrent was achieved, the measured voltage signal becomes nonlinear around zero bias current                          | Mbe(molecular beam epitaxy) | 56 |
|                     | InAs/V                                                                                | Nanowire          | Superconductivity | The nanoscale superconducting vanadium had a high out-of-plane critical field<br>BC = 1.8 T, far exceeding the bulk value<br>Devices fabricated from hybrid InAs/vanadium nanowires showed superconducting transitions at $T < 4$ K | Mbe(molecular beam epitaxy) | 57 |
|                     | YBa <sub>2</sub> Cu <sub>3-x</sub> Ni <sub>x</sub> O <sub>7-<math>\delta</math></sub> | Nanowire          | Superconductivity | The T <sub>c</sub> values range between 70 and 93.2 K for samples with x = 0.04 to x = 0.00, respectively, where the substitution of Cu with Ni results in a lower T <sub>c</sub>                                                   | Electrospinning             | 58 |
|                     | ABC-TLG/hBN                                                                           | Hall bar geometry | Superconductivity | 1/4-filling Mott insulator with $D = -0.54$ V nm <sup>-1</sup> and $n = -5.4 \times 10^{11}$ cm <sup>-2</sup> .<br>Estimated superconducting T <sub>c</sub> of 0.65 K                                                               | Dry transfer                | 59 |

|                                            |                        |                   |  |                                                                                                                                                                                                                                                                                                                                                        |                                          |    |
|--------------------------------------------|------------------------|-------------------|--|--------------------------------------------------------------------------------------------------------------------------------------------------------------------------------------------------------------------------------------------------------------------------------------------------------------------------------------------------------|------------------------------------------|----|
|                                            |                        |                   |  | At $D = -0.17 \text{ V nm}^{-1}$ , where only the 1/2-filling Mott state exists, the phase diagram shows no superconductivity even at base temperature                                                                                                                                                                                                 |                                          |    |
| Graphene/ $\alpha$ - $\text{Mo}_2\text{C}$ | Nonlayered             | Superconductivity |  | The extracted value of the interface transparency is $T \approx 0.7\text{--}0.8$ , indicating a highly transparent high-quality graphene-2D $\alpha$ - $\text{Mo}_2\text{C}$ interface in comparison with previous work on graphene hybrid/heterostructure devices with either deposited or stacked superconducting contacts                           | Chemical vapor deposition                | 60 |
| $\text{NbSe}_2$                            | Nanoplate              | Superconductivity |  | Superconductivity transition is observed within the temperature range of 4.60–5.40 K<br>The $T_c$ at zero magnetic field is 5.05 K, slightly lower than that of bulk $\text{NbSe}_2$ ( $\sim 7.2$ K)<br>A magnetic field of 3.0 T completely suppresses the superconductivity down to the lowest measured temperature. $T_{\text{BKT}} \approx 4.83$ K | Chemical vapor deposition                | 61 |
| $\text{NbC}$                               | 3D nanowire            | Superconductivity |  | FIBID planar nanowires become superconducting at $T_c \approx 5$ K<br>The critical temperature of free-standing 3D nanowires is as high as $T_c \approx 11$ K, which is close to the value of bulk $\text{NbC}$ .                                                                                                                                      | Focused ion beam direct writing          | 62 |
| $\text{WC}$                                | 3D hollow nanowire     | Superconductivity |  | The nanowires become superconducting at 6.4 K and show large critical magnetic field and critical current density resulting from their quasi-one-dimensional superconducting character.                                                                                                                                                                | Focused electron beam induced deposition | 63 |
| $\text{ZnO}$                               | Flower-shaped particle | Insulating        |  | The conductivity decreased with increasing amount (0.1 to 3 wt%) of coated $\text{ZnO}$ nanoparticles<br>The addition of 3 wt% $\text{C}_8$ -coated $\text{ZnO}$ nanoparticles reduced the                                                                                                                                                             | Heat treatment                           | 64 |

|  |     |                    |            |                                                                                                                                                                                                                                                       |                                         |    |
|--|-----|--------------------|------------|-------------------------------------------------------------------------------------------------------------------------------------------------------------------------------------------------------------------------------------------------------|-----------------------------------------|----|
|  |     |                    |            | conductivity of the LDPE by 2–3 orders of magnitude                                                                                                                                                                                                   |                                         |    |
|  | MgO | Hexagonal platelet | Insulating | The lowest volume conductivity was ca. $7 \times 10^{16}$ S m <sup>-1</sup> for 3 wt% surface coated nanoparticles<br>Uniformly dispersed MgO nanoparticles up to contents as high as 9 wt%, with maintained 10–100 times reduced volume conductivity | Liquid precipitation and heat treatment | 65 |

1. Y. Zhao, L. F. Hu, S. Y. Zhao and L. M. Wu, *Adv. Funct. Mater.*, 2016, **26**, 4085-4093.
2. J. Liu, H. Xia, D. F. Xue and L. Lu, *J. Am. Chem. Soc.*, 2009, **131**, 12086-12087.
3. Y. T. Xu, B. L. Chen, J. Nie and G. P. Ma, *Nanoscale*, 2018, **10**, 17021-17029.
4. M. R. Burton, T. J. Liu, J. McGettrick, S. Mehraban, J. Baker, A. Pockett, T. Watson, O. Fenwick and M. J. Carnie, *Adv. Mater.*, 2018, **30**, 1801357.
5. X. L. Shi, A. Wu, T. L. Feng, K. Zheng, W. D. Liu, Q. Sun, M. Hong, S. T. Pantelides, Z. G. Chen and J. Zou, *Adv. Energy Mater.*, 2019, **9**, 1803242.
6. Y. B. Luo, S. T. Cai, X. Hua, H. J. Chen, Q. H. Liang, C. F. Du, Y. Zheng, J. H. Shen, J. W. Xu, C. Wolverton, V. P. Dravid, Q. Y. Yan and M. G. Kanatzidis, *Adv. Energy Mater.*, 2019, **9**, 1803072.
7. J. Zhang, D. Wu, D. S. He, D. Feng, M. J. Yin, X. Y. Qin and J. Q. He, *Adv. Mater.*, 2017, **29**, 1703148.
8. A. J. Zhang, B. Zhang, W. Lu, D. D. Xie, H. X. Ou, X. D. Han, J. Y. Dai, X. Lu, G. Han, G. Y. Wang and X. Y. Zhou, *Adv. Funct. Mater.*, 2018, **28**, 1705117.
9. R. Nunna, P. F. Qiu, M. J. Yin, H. Y. Chen, R. Hanus, Q. F. Song, T. S. Zhang, M. Y. Chou, M. T. Agne, J. Q. He, G. J. Snyder, X. Shi and L. D. Chen, *Energy Environ. Sci.*, 2017, **10**, 1928-1935.
10. L. M. Wang, Z. M. Zhang, L. X. Geng, T. Y. Yuan, Y. C. Liu, J. C. Guo, L. Fang, J. J. Qiu and S. R. Wang, *Energy Environ. Sci.*, 2018, **11**, 1307-1317.
11. L. Zhang, S. Bai, C. Su, Y. B. Zheng, Y. Qin, C. Xu and Z. L. Wang, *Adv. Funct. Mater.*, 2015, **25**, 5794-5798.
12. S. A. Han, T. H. Kim, S. K. Kim, K. H. Lee, H. J. Park, J. H. Lee and S. W. Kim, *Adv. Mater.*, 2018, **30**, 1800342.
13. S. Cheon, H. Kang, H. Kim, Y. Son, J. Y. Lee, H. J. Shin, S. W. Kim and J. H. Cho, *Adv. Funct. Mater.*, 2018, **28**, 1703778.
14. W. Seung, H. J. Yoon, T. Y. Kim, H. Ryu, J. Kim, J. H. Lee, J. H. Lee, S. Kim, Y. K. Park, Y. J. Park and S. W. Kim, *Adv. Energy Mater.*, 2017, **7**, 1600988.
15. J. Wen, B. D. Chen, W. Tang, T. Jiang, L. P. Zhu, L. Xu, J. Chen, J. J. Shao, K. Han, W. Ma and Z. L. Wang, *Adv. Energy Mater.*, 2018, **8**, 1801898.
16. Z. Li, R. Wang, J. Xue, X. Xing, C. Yu, T. Huang, J. Chu, K.-L. Wang, C. Dong, Z. Wei, Y. Zhao, Z.-K. Wang and Y. Yang, *J. Am. Chem. Soc.*, 2019, **141**, 17610-17616.

17. C. W. Chen, H. W. Tsai, Y. C. Wang, T. Y. Su, C. H. Yang, W. S. Lin, Z. H. Lin, J. S. Huang and Y. L. Chueh, *J. Mater. Chem. A*, 2019, **7**, 11452-11459.
18. L. P. Zhu, L. F. Wang, F. Xue, L. B. Chen, J. Q. Fu, X. L. Feng, T. F. Li and Z. L. Wang, *Adv. Sci.*, 2017, **4**, 1600185.
19. M. J. Speirs, D. M. Balazs, H. H. Fang, L. H. Lai, L. Protesescu, M. V. Kovalenko and M. A. Loi, *J. Mater. Chem. A*, 2015, **3**, 1450-1457.
20. K. Mahmood, B. S. Swain, A. R. Kirmani and A. Amassian, *J. Mater. Chem. A*, 2015, **3**, 9051-9057.
21. H. Choi, J. H. Song, J. Jang, X. D. Mai, S. Kim and S. Jeong, *Nanoscale*, 2015, **7**, 17473-17481.
22. M. Karuppannan, Y. Kim, S. Gok, E. Lee, J. Y. Hwang, J. H. Jang, Y. H. Cho, T. Lim, Y. E. Sung and O. J. Kwon, *Energy Environ. Sci.*, 2019, **12**, 2820-2829.
23. B. W. Qin, H. M. Yu, J. Jia, C. Jun, X. Q. Gao, D. W. Yao, X. Y. Sun, W. Song, B. L. Yi and Z. G. Shao, *Nanoscale*, 2018, **10**, 4872-4881.
24. F. Lin, K. Wang, Y. H. Tang, J. P. Lai, M. C. Lou, M. H. Huang and S. J. Guo, *Chem. Commun.*, 2018, **54**, 1315-1318.
25. Y. C. Li and T. V. Nguyen, *J. Power Sources*, 2018, **382**, 152-159.
26. S. Gentil, N. Lalaoui, A. Dutta, Y. Nedellec, S. Cosnier, W. J. Shaw, V. Artero and A. Le Goff, *Angew. Chem. Int. Edn.*, 2017, **56**, 1845-1849.
27. H. Zhu, G. H. Gao, M. L. Du, J. H. Zhou, K. Wang, W. B. Wu, X. Chen, Y. Li, P. M. Ma, W. F. Dong, F. Duan, M. Q. Chen, G. M. Wu, J. D. Wu, H. T. Yang and S. J. Guo, *Adv. Mater.*, 2018, **30**, 1707301.
28. D. J. Li, J. Kang, H. J. Lee, D. S. Choi, S. H. Koo, B. Han and S. O. Kim, *Adv. Energy Mater.*, 2018, **8**, 1702806.
29. L. Z. Bu, N. Zhang, S. J. Guo, X. Zhang, J. Li, J. L. Yao, T. Wu, G. Lu, J. Y. Ma, D. Su and X. Q. Huang, *Science*, 2016, **354**, 1410-1414.
30. S. Sun, T. Zhai, C. Liang, S. V. Savilov and H. Xia, *Nano Energy*, 2018, **45**, 390-397.
31. K. Z. Li, S. K. Li, F. Z. Huang, X. Y. Yu, Y. Lu, L. Wang, H. Chen and H. Zhang, *Nanoscale*, 2018, **10**, 2524-2532.
32. Q. C. Zhang, W. W. Xu, J. Sun, Z. H. Pan, J. X. Zhao, X. N. Wang, J. Zhang, P. Man, J. B. Guo, Z. Y. Zhou, B. He, Z. X. Zhang, Q. W. Li, Y. G. Zhang, L. Xu and Y. G. Yao, *Nano Lett.*, 2017, **17**, 7552-7560.
33. X. Wu, Z. C. Han, X. Zheng, S. Y. Yao, X. Yang and T. Y. Zhai, *Nano Energy*, 2017, **31**, 410-417.
34. Y. Liu, N. Q. Fu, G. G. Zhang, M. Xu, W. Lu, L. M. Zhou and H. T. Huang, *Adv. Funct. Mater.*, 2017, **27**, 1605307.
35. K. F. Chen and D. F. Xue, *J. Colloid Interface Sci.*, 2014, **430**, 265-271.
36. K. H. Kim, W. S. Kim and S. H. Hong, *Nanoscale*, 2019, **11**, 13494-13501.
37. Z. M. Zheng, H. H. Wu, H. X. Chen, Y. Cheng, Q. B. Zhang, Q. S. Xie, L. S. Wang, K. L. Zhang, M. S. Wang, D. L. Peng and X. C. Zeng, *Nanoscale*, 2018, **10**, 22203-22214.
38. Y. Y. Yin, L. S. Fan, Y. Zhang, N. N. Liu, N. Q. Zhang and K. N. Sun, *Nanoscale*, 2019, **11**, 7129-7134.
39. R. D. Hu, H. A. Zhao, J. L. Zhang, Q. H. Liang, Y. N. Wang, B. L. Guo, R. Dangol, Y. Zheng, Q. Y. Yan and J. W. Zhu, *Nanoscale*, 2019, **11**, 178-184.

40. W. B. Li, J. F. Huang, L. L. Feng, L. Y. Cao and S. W. He, *Nanoscale*, 2018, **10**, 21671-21680.
41. L. F. Shen, Y. Wang, H. F. Lv, S. Q. Chen, P. A. van Aken, X. J. Wu, J. Maier and Y. Yu, *Adv. Mater.*, 2018, **30**, 1804378.
42. Q. Li, J. N. Guo, J. Zhao, C. C. Wang and F. Yan, *Nanoscale*, 2019, **11**, 647-655.
43. Z. H. Li, Q. He, X. Xu, Y. Zhao, X. W. Liu, C. Zhou, D. Ai, L. X. Xia and L. Q. Mai, *Adv. Mater.*, 2018, **30**, 1804089.
44. W. G. Chong, Y. H. Xiao, J. Q. Huang, S. S. Yao, J. Cui, L. Qin, C. Gao and J. K. Kim, *Nanoscale*, 2018, **10**, 21132-21141.
45. H. Zhang, H. Cui, J. Li, Y. Liu, Y. Yang and M. Wang, *Nanoscale*, 2019, DOI: 10.1039/c9nr07388d.
46. Y. J. Li, L. Cui, P. F. Da, K. W. Qiu, W. J. Qin, W. B. Hu, X. W. Du, K. Davey, T. Ling and S. Z. Qiao, *Adv. Mater.*, 2018, **30**, 1804653.
47. K. Bon-Ryul, K. H. Kim and H. J. Ahn, *Nanoscale*, 2019, **11**, 3318-3325.
48. W. Q. Wang, X. L. Wang, X. H. Xia, Z. J. Yao, Y. Zhong and J. P. Tu, *Nanoscale*, 2018, **10**, 8162-8169.
49. J. X. Liu, B. Chen, C. Y. Fan, F. Shi, S. Ran, J. Y. Yang, X. Song and S. H. Liu, *Crystengcomm*, 2018, **20**, 1509-1519.
50. S. Ran, J. X. Liu, F. Shi, C. Y. Fan, B. Chen, H. M. Zhang, L. Yu and S. H. Liu, *Sol. Energy Mater. Sol. Cells*, 2018, **174**, 342-350.
51. X. Y. Wu, J. T. Wang, G. K. Zhang, K. Katsumata, K. Yanagisawa, T. Sato and S. Yin, *Appl. Catal. B-Environ.*, 2017, **201**, 128-136.
52. X. Hou, M. J. Wang, L. Fu, Y. P. Chen, N. Jiang, C. T. Lin, Z. W. Wang and J. H. Yu, *Nanoscale*, 2018, **10**, 13004-13010.
53. R. Sadri, M. Hosseini, S. N. Kazi, S. Bagheri, A. H. Abdelrazek, G. Ahmadi, N. Zubir, R. Ahmad and N. I. Z. Abidin, *J. Colloid Interface Sci.*, 2018, **509**, 140-152.
54. S. N. Du, J. L. Sun and P. Wu, *Carbon*, 2018, **140**, 338-351.
55. A. Fornieri, A. M. Whiticar, F. Setiawan, E. Portoles, A. C. C. Drachmann, A. Keselman, S. Gronin, C. Thomas, T. Wang, R. Kallaher, G. C. Gardner, E. Berg, M. J. Manfra, A. Stern, C. M. Marcus and F. Nichele, *Nature*, 2019, **569**, 89-92.
56. N. A. Gusken, T. Rieger, P. Zellekens, B. Bennemann, E. Neumann, M. I. Lepsa, T. Schapers and D. Grutzmacher, *Nanoscale*, 2017, **9**, 16735-16741.
57. M. Bjergfelt, D. J. Carrad, T. Kanne, M. Aagesen, E. M. Fiordaliso, E. Johnson, B. Shojaei, C. J. Palmstrom, P. Krogstrup, T. S. Jespersen and J. Nygard, *Nanotechnology*, 2019, **30**, 294005.
58. J. C. Bernard, D. A. Modesto, M. S. Medina, A. Zenatti, E. C. Venancio, E. R. Leite, A. J. C. Lanfredi and M. T. Escote, *Mater. Res. Express*, 2019, **6**, 086001.
59. G. Chen, A. L. Sharpe, P. Gallagher, I. T. Rosen, E. J. Fox, L. Jiang, B. Lyu, H. Li, K. Watanabe, T. Taniguchi, J. Jung, Z. Shi, D. Goldhaber-Gordon, Y. Zhang and F. Wang, *Nature*, 2019, DOI: 10.1038/s41586-019-1393-y.
60. C. Xu, S. A. Song, Z. B. Liu, L. Chen, L. B. Wang, D. X. Fan, N. Kang, X. L. Ma, H. M. Cheng and W. C. Ren, *ACS Nano*, 2017, **11**, 5906-5914.
61. Y. C. Zou, Z. G. Chen, E. Z. Zhang, F. X. Xiu, S. Matsumura, L. Yang, M. Hong and J. Zou, *Nanoscale*, 2017, **9**, 16591-16595.
62. F. Porrati, S. Barth, R. Sachser, O. V. Dobrovolskiy, A. Seybert, A. S. Frangakis and M. Huth, *ACS Nano*, 2019, **13**, 6287-6296.



63. R. Cordoba, A. Ibarra, D. Maily and J. M. De Teresa, *Nano Lett.*, 2018, **18**, 1379-1386.
64. A. M. Pourrahimi, T. A. Hoang, D. M. Liu, L. K. H. Pallon, S. Gubanski, R. T. Olsson, U. W. Gedde and M. S. Hedenqvist, *Adv. Mater.*, 2016, **28**, 8651-8657.
65. L. K. H. Pallon, A. T. Hoang, A. M. Pourrahimi, M. S. Hedenqvist, F. Nilsson, S. Gubanski, U. W. Gedde and R. T. Otsson, *J. Mater. Chem. A*, 2016, **4**, 8590-8601.
